# Supplementary material for: Large spatial variations in the frontal mass budget of a Greenlandtidewater glacier
Source: Copernicus journal article supplement (doi:10.5194/tc-2018-143), 2018-07-24
Supplement: Supplementary file 1 [file tc-2018-143-supplement.pdf]

# **Supplementary Information**

## **Large spatial variations in the frontal mass budget of a Greenland tidewater glacier**

**Till J. W. Wagner, Fiamma Straneo, Clark G. Richards, Donald Slater,  
Laura A. Stevens, Sarah B. Das, Hanumant Singh**

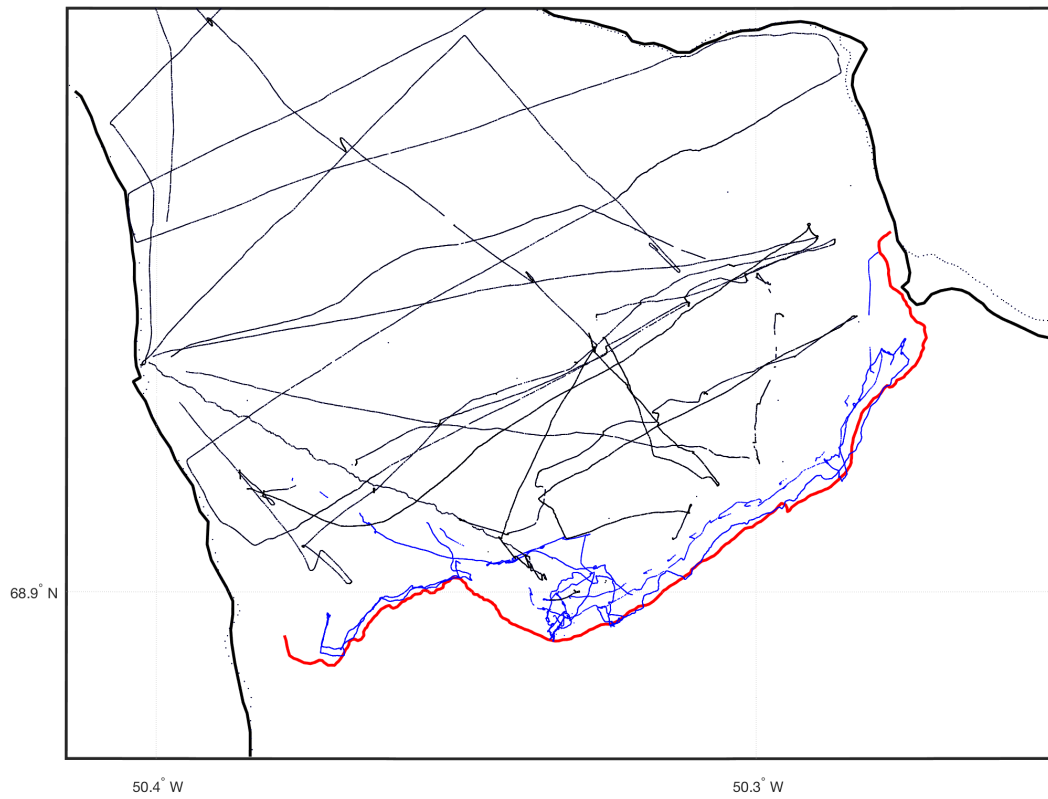

**Figure 1.** Locations of bathymetry readings used to create map in Fig 3a. Blue dots are new data added for this study, while black dots were first presented in Stevens et al (2016), and are also used for the BedMachine3 data product (Morlighem et al, 2017). The red line is the glacier front on 9 July 2013.

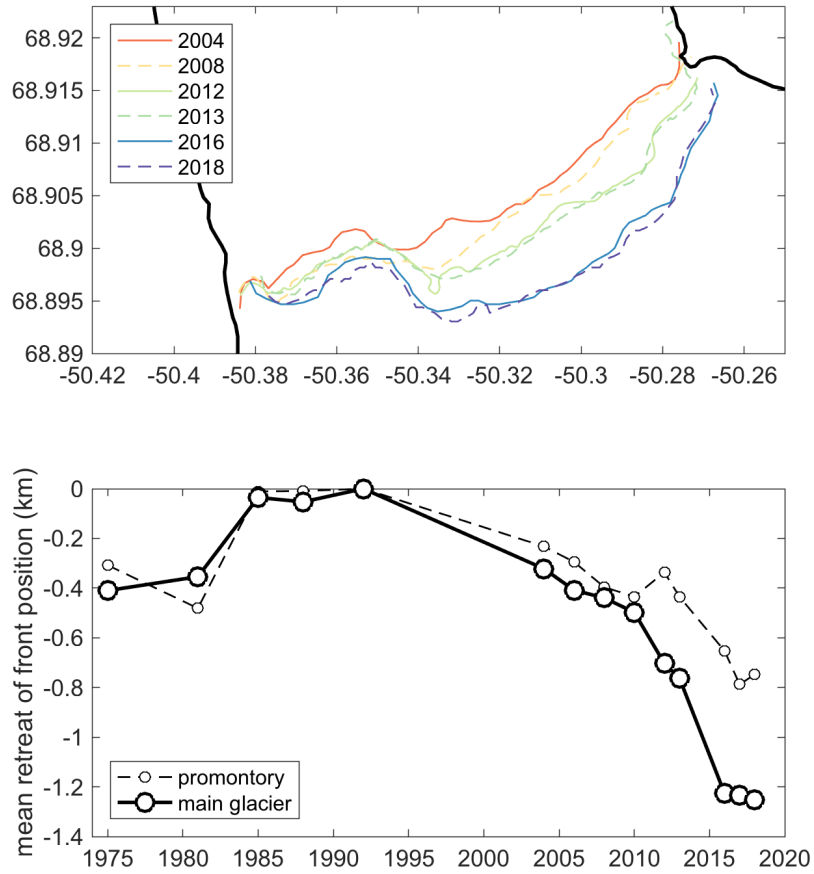

**Figure 2.** Longterm retreat of the Saqqarliup glacier front. While only six profiles from years between 2004 and 2018 are shown in panel (a) for clarity, panel (b) gives the evolution of the mean front position since 1975.
